# Supplementary material for: High surface area electrospun prickle-like hierarchical anatase TiO2 nanofibers for dye-sensitized solar cell photoanodes
Source: Royal Society of Chemistry journal article supplement (doi:10.1039/c3ta10925a), 2013-01-01
Supplement: c3ta10925a.pdf [file c3ta10925a.pdf]

**Electronic supplementary information**

**High Surface Area Electrospun Prickle-like Hierarchical Anatase TiO<sub>2</sub>**

**Nanofibers for Dye-Sensitized Solar Cell Photoanodes**

Yu Pin Lin<sup>1</sup>, Sih Yin Lin<sup>1</sup>, Yuan Ching Lee<sup>1</sup>, Yui Whei Chen-Yang<sup>1,2,3\*</sup>

<sup>1</sup>Department of Chemistry, <sup>2</sup>Center for Nanotechnology and <sup>3</sup>Institute of Biomedical

Technology

Chung Yuan Christian University,

200 Chung Pei Road, Chung Li, Taiwan 32023, R.O.C.

\*Corresponding author. Tel.: +886-3-2653317; Fax: +886-3-2653399.

E-mail address: yuiwhei@cycu.edu.tw (Professor: Y. W. Chen-Yang).

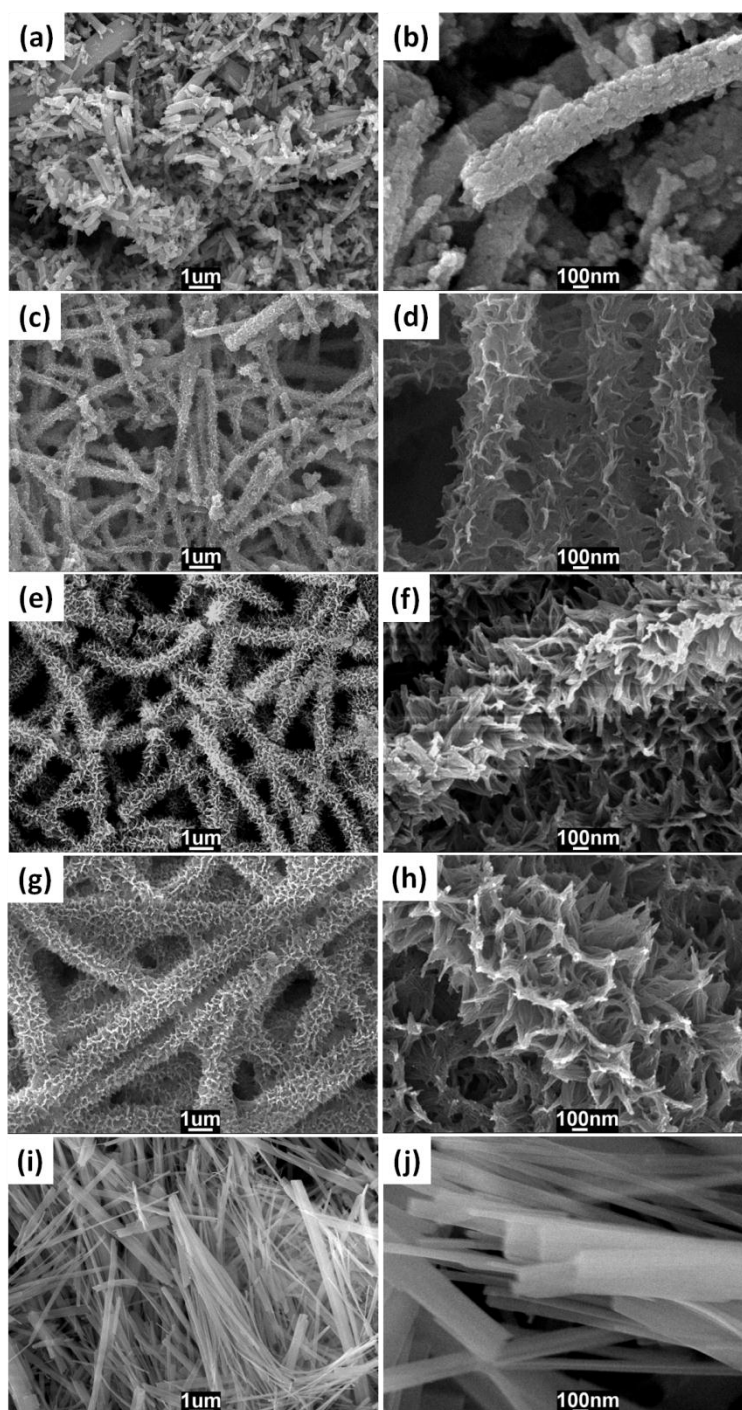

**Fig. S1** FE-SEM surface images and magnification of the  $\text{TiO}_2$  nanofibers obtained with 12 h hydrothermal reaction under various temperatures (a, b) 90 °C, (c, d) 110 °C, (e, f) 130 °C, (g, h) 150 °C (HTF) and (i, j) 170 °C.

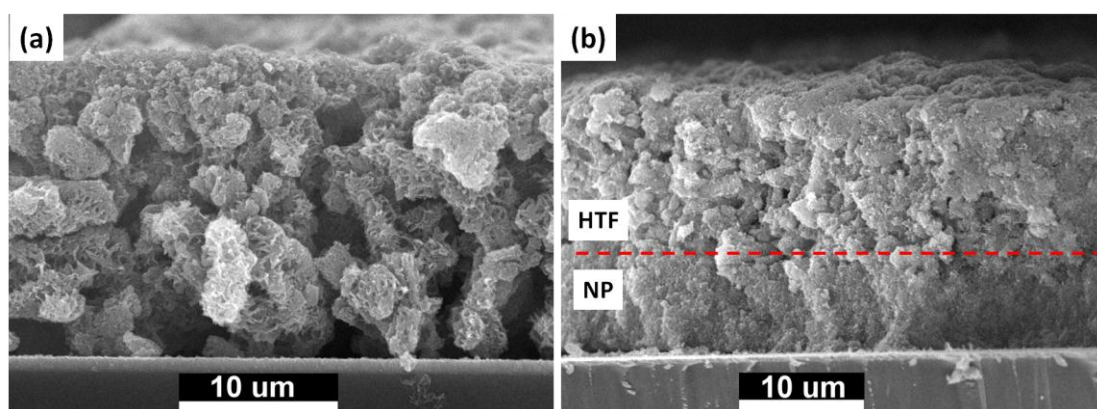

**Fig. S2** FE-SEM cross-section images of photoanodes in (a) HTF-D and (b) BHTF-D.

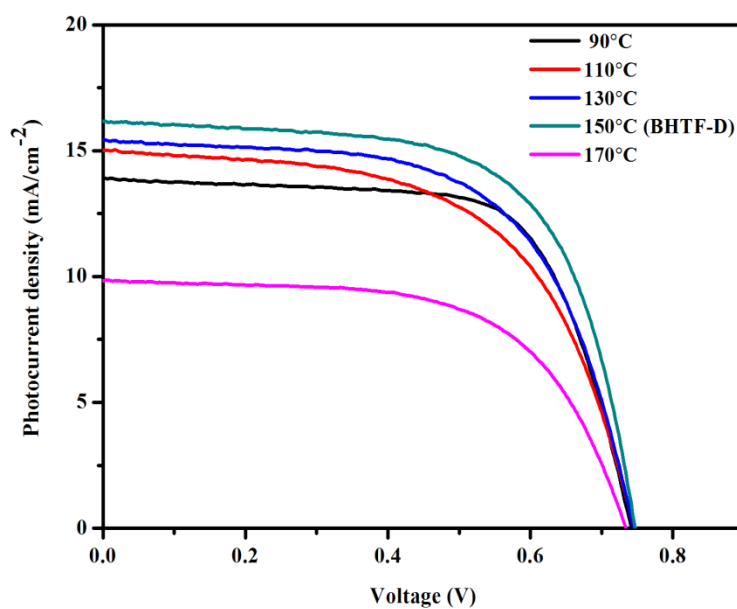

**Fig. S3** *J-V* curves of the bi-layer photoanode-based DSSCs fabricated with the TiO<sub>2</sub> nanofibers obtained with 12 h hydrothermal reaction under various temperatures.
